# Supplementary material
Source: MDPI journal article supplement (https://www.mdpi.com/2071-1050/11/20/5626)
Supplement: s1 [file s1]

**Supplementary Materials**

1. 1. The items below are related to the information quality of online shopping malls' logistics services. Please put a check mark in the column that applies to you.

| Quality of Information                                                                  | Strongly Disagree | Dis-agree | Neither Dis-agreeNor | Agree | Strongly Agree |
|-----------------------------------------------------------------------------------------|-------------------|-----------|----------------------|-------|----------------|
| (1) Products you want to purchase from online shopping malls can be searched for easily | ①                 | ②         | ③                    | ④     | ⑤              |
| (2) All information concerning products is accurately provided.                         | ①                 | ②         | ③                    | ④     | ⑤              |
| (3) There is no excessive advertising in the product information provided.              | ①                 | ②         | ③                    | ④     | ⑤              |
| (4) Various details are provided on the products you want to purchase                   | ①                 | ②         | ③                    | ④     | ⑤              |
| (5) Product information provided by online shopping malls is easy to understand         | ①                 | ②         | ③                    | ④     | ⑤              |

2. 2. The items below are related to the order quality of online shopping malls' logistics services. Please put a check mark in the column that applies to you.

| Quality of Order                                                                       | Strongly Disagree | Dis-agree | Neither | Agree | Strongly Agree |
|----------------------------------------------------------------------------------------|-------------------|-----------|---------|-------|----------------|
| (1)Orders are processed accurately and quickly when using online shopping malls        | ①                 | ②         | ③       | ④     | ⑤              |
| (2)Products ordered and delivered are identical                                        | ①                 | ②         | ③       | ④     | ⑤              |
| (3)There aren't many cases of product substitutions due to products being out of stock | ①                 | ②         | ③       | ④     | ⑤              |
| (4)If the product has been substituted, the substituted                                | ①                 | ②         | ③       | ④     | ⑤              |

product is almost the same as the  
ordered product

|                                          |   |   |   |   |   |
|------------------------------------------|---|---|---|---|---|
| (5)Guaranteed refund/return<br>processes | ① | ② | ③ | ④ | ⑤ |
|------------------------------------------|---|---|---|---|---|

3. 3. The items below are related to the delivery quality of online shopping malls' logistics services. Please put a check mark in the column that applies to you.

| Delivery Quality                                                             | Strongly Disagree | Dis-agree | Neither Dis-agree | Agree | Strongly Agree |
|------------------------------------------------------------------------------|-------------------|-----------|-------------------|-------|----------------|
| (1)Delivery is fast and safe                                                 | ①                 | ②         | ③                 | ④     | ⑤              |
| (2)The means of delivery are diverse and can be freely selected              | ①                 | ②         | ③                 | ④     | ⑤              |
| (3)The current location of products can be easily identified during delivery | ①                 | ②         | ③                 | ④     | ⑤              |
| (4)The delivery is done on time                                              | ①                 | ②         | ③                 | ④     | ⑤              |
| (5)The product is not damaged during delivery                                | ①                 | ②         | ③                 | ④     | ⑤              |

4. 4. The items below are related to the delivery price of online shopping malls' logistics services. Please put a check mark in the column that applies to you.

| Price of Delivery                                                                                    | Strongly Disagree | Dis-agree | Neither | Agree | Strongly Agree |
|------------------------------------------------------------------------------------------------------|-------------------|-----------|---------|-------|----------------|
| (1)Price of delivery is specified before the purchase                                                | ①                 | ②         | ③       | ④     | ⑤              |
| (2)Price of delivery is easily identifiable before the purchase                                      | ①                 | ②         | ③       | ④     | ⑤              |
| (3)Delivery is cheaper than from an offline store                                                    | ①                 | ②         | ③       | ④     | ⑤              |
| (4) Price of delivery is the same regardless of the quantity purchased/total expenditure on products | ①                 | ②         | ③       | ④     | ⑤              |
| (5) You do not have to pay additional delivery charges for refunds                                   | ①                 | ②         | ③       | ④     | ⑤              |

5. 5. The items below are related to the customer service of online shopping malls' logistics. Please put a check mark on the column that applies to you.

| Customer Service | Strongly Disagree | Dis-agree | Neither | Agree | Strongly |
|------------------|-------------------|-----------|---------|-------|----------|
|------------------|-------------------|-----------|---------|-------|----------|

|                                                                                              |   |   |   |   |   |
|----------------------------------------------------------------------------------------------|---|---|---|---|---|
| (1)Online shopping malls provide information on delivery processes after purchasing products | ① | ② | ③ | ④ | ⑤ |
| (2)When asked about product delivery, the response from the shopping mall is compassionate   | ① | ② | ③ | ④ | ⑤ |
| (3)Reception/service by the delivery person is friendly                                      | ① | ② | ③ | ④ | ⑤ |
| (4)The malls provide swift answers to customers' questions                                   | ① | ② | ③ | ④ | ⑤ |
| (5)Refund/return service is swiftly provided                                                 | ① | ② | ③ | ④ | ⑤ |

6. The items below are related to customer satisfaction of online shopping malls' logistics services. Please put a check mark on the column that applies to you.

| Customer Satisfaction                                                                                             | Strongly Disagree | Dis-agree | Neither | Agree | Strongly Agree |
|-------------------------------------------------------------------------------------------------------------------|-------------------|-----------|---------|-------|----------------|
| (1)Use of online shopping malls saves time compared with using conventional malls                                 | ①                 | ②         | ③       | ④     | ⑤              |
| (2)Online shopping malls you use most frequently offer certain items cheaper than those offered in offline stores | ①                 | ②         | ③       | ④     | ⑤              |
| (3)Are you satisfied with purchases from the shopping mall you use?                                               | ①                 | ②         | ③       | ④     | ⑤              |
| (4)Are you satisfied with the logistics service?                                                                  | ①                 | ②         | ③       | ④     | ⑤              |
| (5)Are you satisfied with the logistics service of online shopping malls in general?                              | ①                 | ②         | ③       | ④     | ⑤              |

7. The items below are related to customer repurchases in online shopping malls and logistics services. Please put a check mark on the column that applies to you.

| Intention for Repurchase                                          | Strongly Disagree | Dis-agree | Neither Disagree | Agree | Strongly Agree |
|-------------------------------------------------------------------|-------------------|-----------|------------------|-------|----------------|
| (1) You feel attachment to the online shopping mall you use       | ①                 | ②         | ③                | ④     | ⑤              |
| (2)You feel trust in the online shopping mall you use             | ①                 | ②         | ③                | ④     | ⑤              |
| (3)You want to revisit/reuse the online shopping mall you use     | ①                 | ②         | ③                | ④     | ⑤              |
| (4)You plan to continue to use the online shopping malls you used | ①                 | ②         | ③                | ④     | ⑤              |

1. What is your gender?

① Female ② Male

2. What is your age?

① Below 19 ② 20-29 ③ 30-39 ④ Above 40

3. What is your level of education?

① High school diploma or below ② Currently enrolled in university

- ③ Graduated from university ④ Above graduate school
4. What is your job?  
① Student ② Staff/Employee ③ Housewife  
④ Self-employed ⑤ Other ( )
5. What is your average monthly earning? (Unit: Yuan)  
① Below 2000 ② 2001–4000 ③ 4001–6000  
④ 6001–8000 ⑤ Above 8000
6. How often do you purchase products from online shopping malls in a month?  
① Not at all ② 1–2 times ③ 3 times ④ More than 3 times
7. Which online shopping mall do you mainly use at present?  
① Tao Bao(淘宝网) ② Jing Dong(京东商城)  
③ Zhuo Yue(卓越) ④ Dang(当当)  
⑤ Amazon(亚马逊) ⑥ Other ( )
